# Supplementary material
Source: Research Square preprint supplement (doi:10.21203/rs.3.rs-8950195/v1)
Supplement: Supplementary file 1 [file 4c371bc7fa4188292f51bb16.xlsx]

## Sheet: Table S1
Table S1. Patient and Note Counts in the Optum's EHR Dataset with ICD Diagnosis Codes (2007-2023)
Code	Code Type	Description	Patient Count	Note Count
3051	ICD-9 Dx	Tobacco use disorder	391536	2943225
98984	ICD-9 Dx	Toxic effect of Tobacco	510	3334
V1582	ICD-9 Dx	Personal history of tobacco use	197364	1721680
F17210	ICD-10 Dx	Nicotine dependence, cigarettes, uncomplicated	591683	3999763
F17211	ICD-10 Dx	Nicotine dependence, cigarettes, in remission	14258	137125
F17213	ICD-10 Dx	Nicotine dependence, cigarettes, with withdrawal	3535	29067
F17218	ICD-10 Dx	Nicotine dependence, cigarettes, with other nicotine-induced disorders	9489	101900
F17219	ICD-10 Dx	Nicotine dependence, cigarettes, with unspecified nicotine-induced disorders	9004	80870
T65221A	ICD-10 Dx	Toxic effect of tobacco cigarettes, accidental (unintentional), initial encounter	135	1056
T65221D	ICD-10 Dx	Toxic effect of tobacco cigarettes, accidental (unintentional), subsequent encounter	6	65
T65221S	ICD-10 Dx	Toxic effect of tobacco cigarettes, accidental (unintentional), sequela	5	37
T65222A	ICD-10 Dx	Toxic effect of tobacco cigarettes, intentional self-harm, initial encounter	121	962
T65222D	ICD-10 Dx	Toxic effect of tobacco cigarettes, intentional self-harm, subsequent encounter	4	5
T65222S	ICD-10 Dx	Toxic effect of tobacco cigarettes, intentional self-harm, sequela	70	713
T65223A	ICD-10 Dx	Toxic effect of tobacco cigarettes, assault, initial encounter	1	17
T65223D	ICD-10 Dx	Toxic effect of tobacco cigarettes, assault, subsequent encounter	1	2
T65223S	ICD-10 Dx	Toxic effect of tobacco cigarettes, assault, sequela	-	-
T65224A	ICD-10 Dx	Toxic effect of tobacco cigarettes, undetermined, initial encounter	65	592
T65224D	ICD-10 Dx	Toxic effect of tobacco cigarettes, undetermined, subsequent encounter	11	96
T65224S	ICD-10 Dx	Toxic effect of tobacco cigarettes, undetermined, sequela	5	68
Z720	ICD-10 Dx	Tobacco use	408168	2996951
Z87891	ICD-10 Dx	Personal history of nicotine dependence	844203	6469782
*Patient and Note counts are unique within each row; a patient/note may appear in more than one row.

## Sheet: Table S2
	Table S2. Patient and Note Counts for Terms Related to Electronic Nicotine Delivery System (ENDS) Use
		Vaping Variants			E-cigarette Variants			ENDS Brand Names
	Term	Patients	Notes	Term	Patients	Notes	Term	Patients	Notes
	Vaping	2951664	14341471	E-Cigarette or E Cigarette	2220214	10248902	Hqd	77586	87154
	Vape	1343839	10200711	electronic cigarettes	1280997	9914734	Leap	36686	81403
	Vapes	113899	289839	e-cigarettes or e cigarettes	1390672	6153289	Glas	9539	27516
	Vape pen or Vape-pen	15392	32676	e-cig or e cig	218652	1040704	Juul	9185	21936
	Vaped	11907	28402	electronic cigarette	155683	397016	Juul Vape	304	672
	Using Vape	3940	8753	ecig	51832	108991	Phix	340	358
	Vape pens or Vape-pens	3923	6019	e-cigs or e cigs	16697	47779	Mr Fog	90	145
	Smoking Vape	2399	3149	ecigarette	2905	7354	My Blu	90	95
	Vaping device	1252	2095	electric-cigarette or electric cigarette	2335	5948	Lost Mary	46	70
	Smokes Vape	778	1682	E smoking or E-smoking	4235	5768	Lava 2	25	65
	Electronic Vapor	307	931	e-cigg or e cigg	787	3459	Bidi Stick	1	54
	E-vape	310	912	electric-cigarettes or electric cigarettes	1331	3295	Breeze Pro	19	41
	E vape or E-Vapes	310	912	ecigarettes	1403	3125	Elfbar	18	27
	Electronic vape	347	655	electric-cig or electric cig	359	1742	Breeze Plus	14	20
	Disposable Vape or Disposable-Vape	281	453	e-ciggs or e ciggs	370	1484	Blu Vape	9	12
	Pod system or Pod-System	206	281	electric-cigs or electric cigs	133	569	Vuse Alto	6	10
	Electronic Vapor cigarette	90	216	e-ciggarettes or e-ciggarettes	95	354	Esco Bars	5	8
	Vape pods	80	148	e-ciggarette or e ciggarette	131	353	Logic Power	8	8
	Electronic Vapor cigarettes	75	148	e cigaretes	75	212	Logic Pro	6	7
	Electric Vapor	33	124	e-cigaretes	75	212	Blu Plus	5	5
	Vape pod or Vape-pod	66	112	electronic ciggarette	57	186	Lava Plus	4	5
	EVape	45	106	electric-cigg or electric cigg	32	161	Vuse Solo	1	4
	Electronic vapes	31	68	eciggarettes	5	145	Vuse Vibe	3	4
	Electric Vape	26	50	electronic ciggarettes	39	127	Suorin Air	2	2
	Disposable vape pen	33	45	e-cigarete or e cigarete	35	126	Blu Classic	1	1
	Electric Vaping	11	37	electronic cigarete	14	87	Elfbar Bc5000	1	1
	Vape mod or Vape-mod	11	20	e-cigarette device or e cigarette device	62	68	Hyppe Max Flow	1	1
	Vape mods or Vape-mods	3	18	electronic cigaretes	17	49	21St Century Smoke	0	0
	Pod vape or Pod-Vape	8	10	Electronic Nicotine cigarettes	18	34	Blu vape bar	0	0
	Electric vapes	3	3	eciggarette	18	26	Eb Design Bc5000	0	0
	Vape pen kit	1	1	electric-cigarete or electric cigarete	3	26	Epic Series By Jak	0	0
				Electronic Nicotine cigarette	17	22	Flair Infinity	0	0
				electric-ciggarette	11	15	Fume Extra	0	0
				electric ciggarette	11	15	Fume Infinity	0	0
				electric-cigaretes or electric cigaretes	3	15	Fume Ultra	0	0
				electric-ciggs or electric ciggs	7	11	Greensmartliving	0	0
				ecigarete	6	10	Hqd Cuvie Plus	0	0
				e-ciggaretes or e ciggaretes	6	7	Juicy Bar Jb5000	0	0
				electriccigarette	6	6	Kado Bar Br5000	0	0
				ecigaretes	3	5	Kangvape Onee Stick	0	0
				electric-ciggarettes or electric ciggarettes	3	5	Kangvape Tc8000	0	0
				Electric Nicotine cigarette	2	5	Loon Air Plus	0	0
				ecigarette device	4	4	Loon Maxx	0	0
				e-ciggarete or e ciggarete	2	2	Loon Typhoon	0	0
				electriccigarettes	1	1	Lost Mary Mo5000	0	0
				Electric Nicotine cigarettes	1	1	Lost Vape Orion	0	0
				eciggarete	0	0	Mngo Stick	0	0
							Mr Fog Switch	0	0
							My Blu Intense	0	0
	*Counts are unique within each row; a patient/note may appear in more than one row.						Njoy Ace	0	0
	**Counts for longer terms (e.g., vapes, vaped) represent subsets of overlapping shorter terms (e.g., vape)						Njoy Daily	0	0
							Sugar Extrax	0	0

## Sheet: Table S3
	Table S3. Patient and Note Counts for Terms Related to Nicotine Pouch Use
		Pouch Variants			Pouch Brand Names
	Term	Patients	Notes	Term	Patients	Notes
	Nicotine Pouche	2095	4255	ZYN	72890	76752
	Nicotine Pouchs	546	1247	VELO	9591	17019
	Tobacco free nicotine pouches	35	66	ROGUE	2548	6967
	Oral Nicotine Pouches	35	59	ZYN Nicotine	171	311
	Oral Nicotine Pouch	16	22	ZYN Nicotine Pouch	22	51
	Tobacco free nicotine pouch	5	7	VELO Nicotine	11	19
	Nicotine bags	4	5	DRYFT	12	14
	Nicotine bag	2	2	Rogue Nicotine	6	9
	White nicotine pouch	0	0	DRYFT Nicotine	1	3
	White nicotine pouches	0	0	Rogue Nicotine Pouch	1	1
				DRYFT Nicotine Pouch	0	0
				VELO Nicotine Pouch	0	0
	*Patient and Note counts are unique within each row; a patient/note may appear in more than one row.
	**Counts for longer terms (e.g., Nicotine Pouches) represent subsets of overlapping shorter terms (e.g., Nicotne Pouch)

## Sheet: Table S4
Table S4. Patient and Note Counts for Terms Related to Combustible Tobacco Use
	Current Smoking			Former Smoking			Cigar			Water Pipe
Term	Patients	Notes	Term	Patients	Notes	Term	Patients	Notes	Term	Patients	Notes
Current smoker	238277	778787	Former smoker	1152965	7796147	Cigar	44446	210087	Hookah	6015	18306
Continues to smoke	173614	417333	Ex-smoker	109708	678737	Smokes cigars	8083	25507	Smokes hookah	929	2521
Smoking cigarettes	46584	114580	Stopped smoking	103725	309585	Smoking cigars	5429	14833	Smoking hookah	462	787
Smokes cigarettes	40674	111480	Previously smoked	20302	43214	Cigar smoking	2468	5745	Water pipe	172	273
Active smoker	29002	65616	Quit smoking cigarettes	15890	37794	Cigar use	1268	3318	Smokes tobacco pipe	37	76
Smokes tobacco daily	28145	191689	Former cigarette smoker	13797	45783	Smokes cigar	911	2943	Shisha	32	133
Smokes tobacco	21774	123742	Quit cigarettes	7782	31925	Cigarillo	385	1697	Smoking tobacco pipe	8	27
Chronic smoker	13638	27921	Ex smoker	6552	13443	Smoking cigar	332	741	Uses tobacco pipe	7	25
Current cigarette smoker	7005	10919	Prior smoker	5361	10834	Uses Cigar	42	199	Occasionally uses hookah	4	17
Continues smoking	5149	9666	Quit smoking tobacco	3852	6126	Cigar user	62	136	Smokes Shisha	4	6
Smoker: Yes	4550	6490	Past smoker	3122	5813	Smokes cigar occasionally	35	115	Occasional use of hookah	3	3
Smoking: Yes	3769	7327	Not currently smoking	2671	4779	Occasionally smokes cigar	18	106	Sheesha	2	2
Smokes occasionally	2557	6378	Successfully quit smoking	1956	4481	Active cigar smoker	33	67	Smokes water pipe	1	1
Cigarette user	2384	8983	Formerly smoked	1622	4006	Chronic cigar smoker	19	38	Smoking water pipe	1	1
Smokes cigarettes daily	1225	1627	Exsmoker	1490	8411	Smokes cigarillo	8	25	Water-pipe	0	0
Smoking Yes	1030	1981	Former tobacco smoker	1139	2393	Former cigar user	8	22	Smokes tobacco-pipe	0	0
Currently smokes cigarettes	1002	1691	Tobacco-free	1045	1549	Cigarillo use	8	13	Smoking tobacco-pipe	0	0
Daily cigarette smoker	679	928	Tobacco use, former	739	1427	Smoking cigarillo	1	5	Uses tobacco-pipe	0	0
Smoking status: Current smoker	627	1192	Reformed smoker	508	1021	Smoke cigarillo	2	3	Smokes water-pipe	0	0
Smokes cigarettes occasionally	529	719	Previous tobacco user	418	531	Cigarillo smoking	1	1	Hubble-bubble	0	0
Occasionally smokes cigarettes	436	566	Ceased smoking	329	529	Chronic cigar user	1	1	Smoking water-pipe	0	0
Active tobacco smoker	433	676	Abstinent from cigarettes	283	443	Occasionally uses cigar	0	0	Smokes Hubble-bubble	0	0
Currently smokes tobacco	429	1204	Smoking cessation achieved	279	593	Occasionally smoking cigar	0	0	Narghile	0	0
Chain smoker	429	1204	Abstaining from cigarettes	138	167	Regularly smokes cigar	0	0	Occasional use of sheesha	0	0
Smokes regularly	418	623	Has quit smoking tobacco	120	157	Active cigar user	0	0	Smokes waterpipe	0	0
Smoker Yes	396	898	No longer smokes tobacco	108	152	Uses cigarillo	0	0	Smokes Sheesha	0	0
Daily tobacco smoker	312	548	Tobacco abstinent	46	141	Occasionally uses cigarillo	0	0	Smoking Sheesha	0	0
Active tobacco user	302	534	Gave up cigarette smoking	18	30	Occasionally smokes cigarillo	0	0	Smokes Narghile	0	0
smoking cigarettes daily	298	407	History of smoking, not current	8	9	Active cigarillo user	0	0	Smoking waterpipe	0	0
Actively smoking cigarettes	118	166	Ceased smoking cigarettes	8	9	Active cigarillo smoker	0	0	Occasional use of shisha	0	0
Smokes cigarettes regularly	113	180	Cigarette use discontinued	6	6	Chronic cigarillo user	0	0	Regular use of hookah	0	0
Smokes tobacco occasionally	92	114	Non-smoker, previously smoked	6	6	Chronic cigarillo smoker	0	0	Regular use of sheesha	0	0
Occasionally smokes tobacco	90	116	Reformed cigarette smoker	2	16	Smokes cigarillo occasionally	0	0	Regular use of shisha	0	0
smoking tobacco daily	72	88	History of tobacco use, currently abstinent	2	9	Occasionally smokes cigarillo	0	0	Occasional use of water pipe	0	0
Actively smokes cigarettes	61	88	Abstinent from tobacco smoking	0	0	Occasionally smoking cigarillo	0	0	Occasional use of water-pipe	0	0
Smoking status:Current smoker	57	64	Abstaining from tobacco smoking	0	0	formerly using cigar	0	0	Occasional use of waterpipe	0	0
Actively smoking tobacco	54	75	Reformed tobacco smoker	0	0	Regularly smokes cigarillo	0	0	Regular use of water pipe	0	0
Smoking status: Y	35	54	History of smoking, no current tobacco use	0	0	Cigarillo user	0	0	Regular use of water-pipe	0	0
Smokes Yes	30	62	Prior cigarette dependence	0	0	Regularly uses cigar	0	0	Regular use of waterpipe	0	0
Actively smokes tobacco	28	44	Gave up tobacco smoking	0	0	Regularly uses cigarillo	0	0	Occasionally uses sheesha	0	0
Smoker: Y	26	28	Abstinent from cigarettes smoking	0	0	Cigar:Y	0	0	Occasionally uses Shisha	0	0
Smoking status: positive	19	25	Abstaining from cigarettes smoking	0	0	Cigar: Y	0	0	Occasionally uses water-pipe	0	0
Smokes cigarette daily	10	14	Formerly a regular smoker	0	0	Cigarillo:Y	0	0	Occasionally uses water pipe	0	0
Smokes: Yes	9	12	No current tobacco use, history of smoking	0	0	Cigarillo: Y	0	0	Occasionally uses waterpipe	0	0
Smoking cigarettes everyday	9	9	Previous cigarette dependence	0	0	Cigar:Yes	0	0	Smoking Narghile	0	0
Smoker Y	8	10	Abstaining from using cigarettes	0	0	Cigar: Yes	0	0	Uses Narghile	0	0
Smoking status positive	7	20	Abstinent from using cigarettes	0	0	Cigarillo:Yes	0	0
Smoker:Y	7	9	Non-smoking, ex-user	0	0	Cigarillo: Yes	0	0
Smokes:Yes	4	4
Continues cigarettes	0	0
Smokes tobacco everyday	0	0
Active cigarette user	0	0
Chronic cigarette user	0	0
smoking cigarette daily	0	0
Smokes: Y	0	0
Smokes Y	0	0
Smoking:Y	0	0
Smoking tobacco everyday	0	0
Habitual cigarette smoker	0	0
Chain cigarette smoker	0	0
Smokes cigarette everyday	0	0
Chain tobacco smoker	0	0
Smoking status:Y	0	0
Smoking cigarette everyday	0	0
Actively smokes cigarette	0	0
Smokes:Y	0	0
Current cigarette dependence	0	0
Self reported cigarette smoker	0	0
Current smoking status: Positive	0	0
Current smoking status Positive	0	0
Current smoking status: Y	0	0
Current smoking status Y	0	0
Self reported tobacco smoker	0	0
Current cigarettes dependence	0	0
Self reported tobacco smoker	0	0
*Patient and Note counts are unique within each row; a patient/note may appear in more than one row.

## Sheet: Table S5
	Table S5. Patient Count by Year for Top 10 "Vape" and "E-cigarette" variants among the Study Population (2007-2023)
	Vape Variant Term	2007	2008	2009	2010	2011	2012	2013	2014	2015	2016	2017	2018	2019	2020	2021	2022	2023
	Vaping	0	0	0	0	0	0	3	64	457	1342	4222	12187	16982	80051	357805	447212	427042
	Vape	0	0	0	0	0	4	15	114	584	1335	3981	8098	104516	190932	235128	152416	125798
	Vapes	0	0	0	0	0	0	6	34	178	426	1384	3130	5727	7583	10230	11864	11773
	Vaped	0	0	0	0	0	0	0	0	4	13	55	113	489	685	900	871	828
	Vape pen or Vape-pen	0	0	0	0	0	0	0	1	15	31	87	219	552	522	721	801	638
	E vape or E-Vapes	0	0	0	0	0	0	1	3	14	48	124	202	379	358	582	785	758
	Using Vape	0	0	0	0	0	0	0	6	56	93	193	335	454	352	436	426	387
	Vaping device	0	0	0	0	0	0	0	2	10	8	12	42	91	82	176	395	793
	Vape pens or Vape-pens	0	0	0	0	0	0	0	0	1	3	6	10	32	40	62	126	114
	Smokes Vape	0	0	0	0	0	0	0	1	8	13	33	27	50	49	67	100	70
	E-cigarette Variant Term	2007	2008	2009	2010	2011	2012	2013	2014	2015	2016	2017	2018	2019	2020	2021	2022	2023
	E-cig	0	1	2	9	80	274	1613	6280	10467	10367	16827	18457	119190	247467	428747	360030	291429
	E-Cigarette	0	0	2	8	58	197	1092	4311	7421	8329	14118	15996	117367	246050	416014	337840	266470
	E-cigarettes	0	0	1	3	24	85	570	2565	4892	6991	10791	11723	20655	45988	120851	143839	106515
	Electronic cigarette	0	0	6	23	159	718	2777	4062	7381	5081	21948	23406	104252	172746	210633	122790	96326
	Electronic cigarettes	0	0	1	9	42	336	1673	2654	5488	4064	19068	20114	103135	170770	207285	120054	93852
	E cig	187	225	424	537	1340	3067	5842	18889	37631	37747	50661	81511	93874	89004	91742	84476	64136
	E cigarette	183	212	401	488	1191	2648	4898	16681	34107	35080	46494	54159	89513	85061	87512	81267	61610
	E cigarettes	149	154	301	369	840	1927	3610	14506	30405	31960	41428	70807	82705	78909	80337	75346	57331
	E smoking	353	525	909	1337	4720	9869	21334	31138	59993	70086	101994	106849	80397	79328	88068	56032	43427
	Ecig	0	0	0	0	9	21	160	752	1462	858	1611	1626	3611	11416	10806	6242	4551
	* Patient counts are unique within each cell; a patient may appear in more than one column/row
	**patient counts for longer terms (e.g., Vapes, Vaped) are subsets of overlapping shorter terms (Vape)

## Sheet: Table S6
Table S6. Patient Count by Year for Top 4 ENDS Brand Names among the Study Population (2011-2023)
	ENDS Brand Names	2011	2012	2013	2014	2015	2016	2017	2018	2019	2020	2021	2022	2023
	Leap	17	62	144	191	1543	2484	2346	2485	1554	1461	2328	1717	1584
	Juul	0	1	3	0	0	5	12	111	945	919	933	469	342
	Hqd	0	0	11	18	46	50	266	335	311	415	469	350	216
	Phix	0	3	8	21	25	36	46	53	59	117	75	58	21
	*No brand name documentation prior to 2011
	** Patient counts are unique within each cell; a patient may appear in more than one column/row

## Sheet: Table S7
	Table S7. Patient Count by Year for Top 5 Nicotine Pouch Terms among the Study Population (2011-2023)
	Nicotine Pouch Terms	2011	2012	2013	2014	2015	2016	2017	2018	2019	2020	2021	2022	2023
	Nicotine Pouch	1	1	0	2	0	0	5	2	31	100	225	306	407
	Nicotine Pouches	0	0	0	1	0	0	1	3	27	73	176	251	343
	Oral Nicotine Pouch	0	0	0	0	0	0	0	0	2	1	2	5	9
	Oral Nicotine Pouches	0	0	0	0	0	0	0	0	1	0	2	4	6
	Tobacco free Nicotine pouches	0	0	0	0	0	0	0	0	0	0	0	4	0
	*No nicotine pouch terms appeared prior to 2011
	**Patient count is unique within each cell; a patient/may appear in more than one column/row
	***The bottom 4 rows are all subsets of the first row and the terms all contain “nicotine pouch” as a substring

## Sheet: Table S8
Table S8. Patient Counts by Year for Top 4 Nicotine Pouch Brand Names among the Study Population (2011-2023)
	Nicotine Pouch Brand Names	2011	2012	2013	2014	2015	2016	2017	2018	2019	2020	2021	2022	2023
	Velo	4	5	14	113	382	542	823	847	527	533	601	443	213
	Zyn	0	4	8	9	30	42	63	54	60	90	129	132	139
	Rogue	0	1	5	6	49	64	99	127	104	111	62	30	32
	Zyn Nicotine	0	0	0	0	0	0	0	0	4	9	8	20	10
	*No nicotine brand terms appeared prior to 2011
	** Patient count is unique within each cell; a patient/may appear in more than one column/row;
	***Counts in the “Zyn Nicotine” column are subsets of those in “Zyn” column as it contains “Zyn” substring
